# Supplementary material
Source: MDPI journal article supplement (https://www.mdpi.com/2073-4344/12/1/41)
Supplement: s1 [file s1]

# Investigation of Photocatalysis by Mesoporous Titanium Dioxide Supported on Glass Fibers as an Integrated Technology for Water Remediation

Cristina De Ceglie <sup>1,†</sup>, Sudipto Pal <sup>2,\*,†</sup>, Sapia Murgolo <sup>1</sup>, Antonio Licciulli <sup>2</sup> and Giuseppe Mascolo <sup>1,\*</sup>

<sup>1</sup> Istituto di Ricerca sulle Acque, National Council Research, Via F. De Blasio 5, 70132 Bari, Italy; cristina.deceglie@ba.irsra.cnr.it (C.D.C.); sapia.murgolo@ba.irsra.cnr.it (S.M.)

<sup>2</sup> Department of Innovation Engineering, University of Salento, Via Per Monteroni, Lecce, Italy; antonio.licciulli@unisalento.it

\* Correspondence: sudipto.pal@unisalento.it (S.P.); giuseppe.mascolo@ba.irsra.cnr.it (G.M.)

†

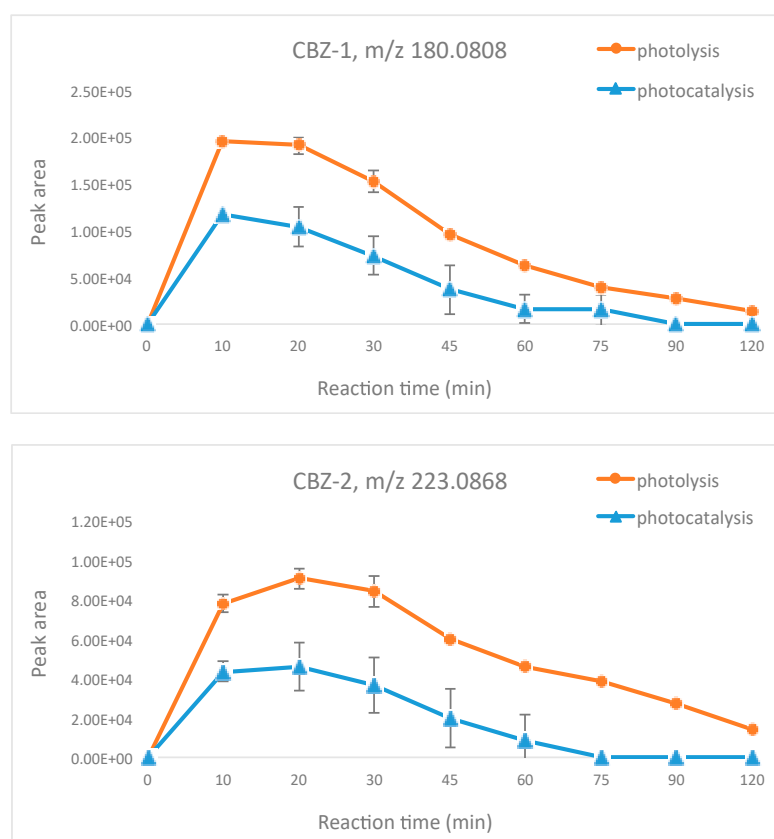

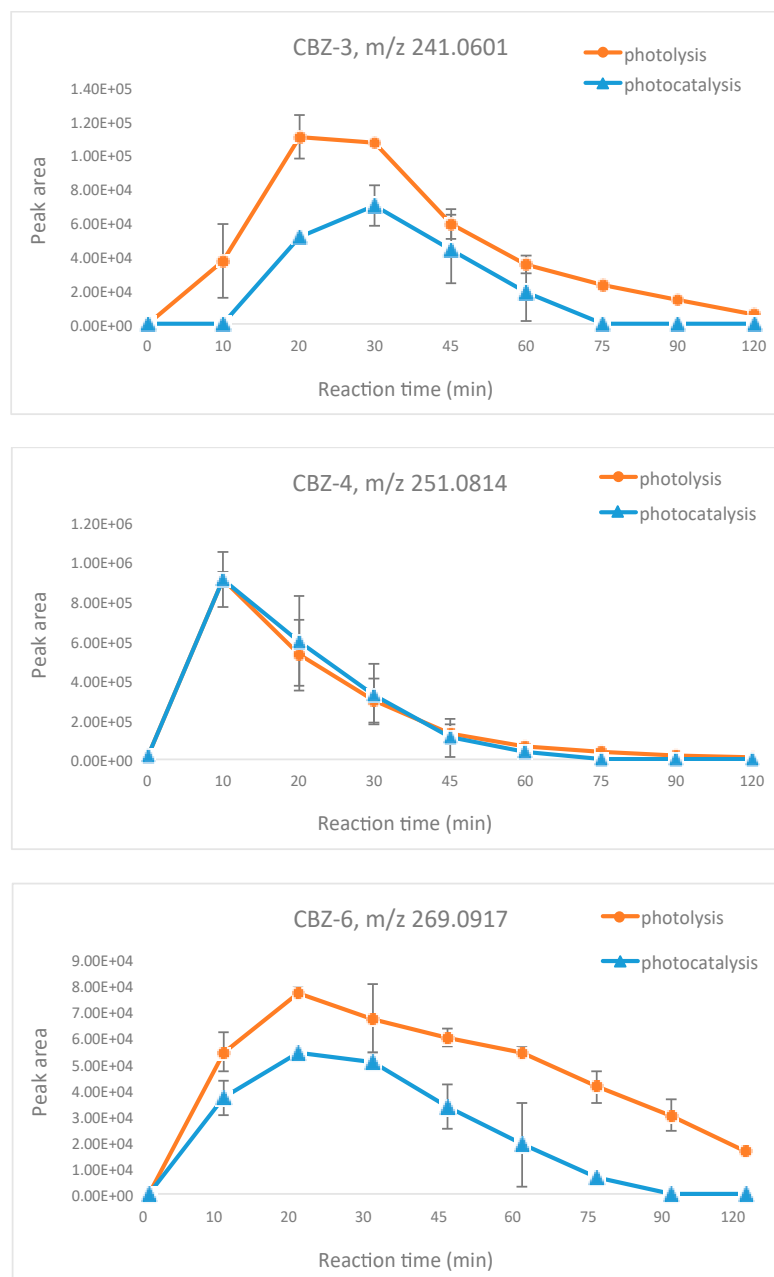

**Figure S1.** Time profiles of CBZ TPs during photolysis and photocatalysis with mesoporous TiO<sub>2</sub> coated on glass fibers, using secondary wastewater effluent.

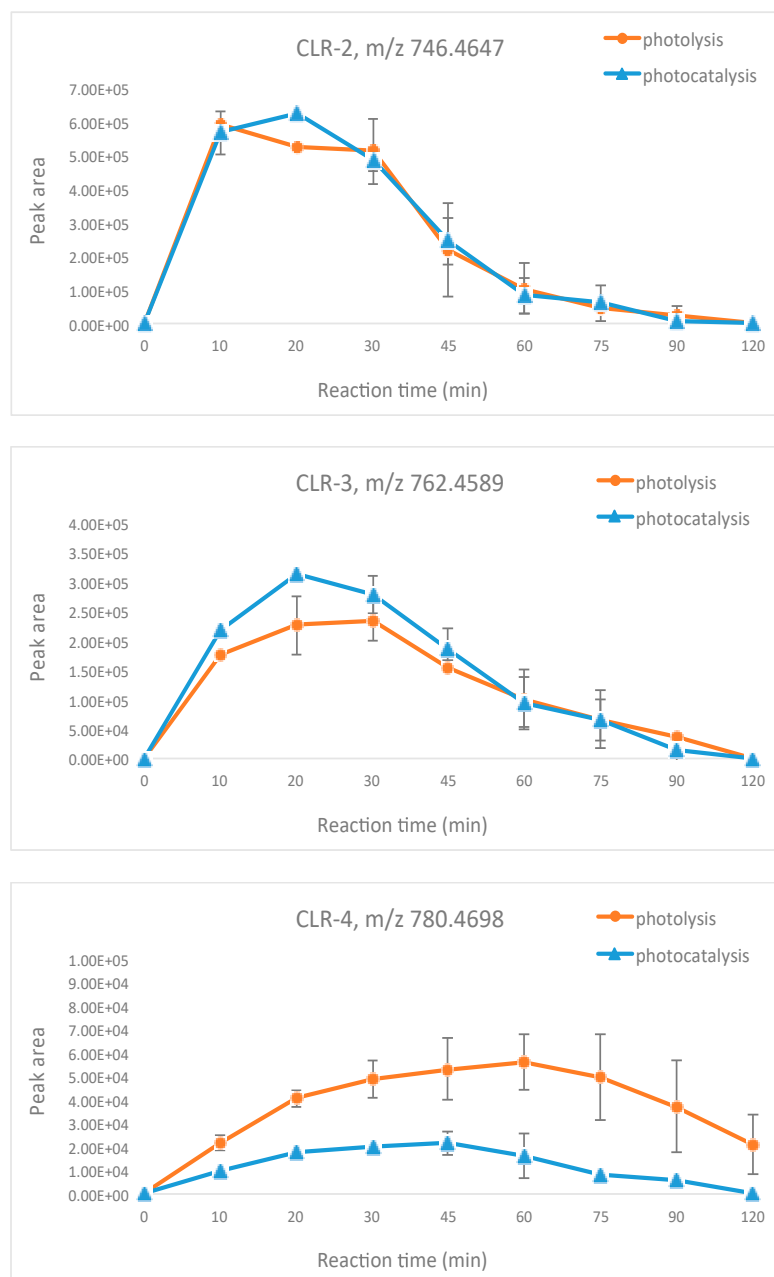

**Figure S2.** Time profiles of CLR TPs during photolysis and photocatalysis with mesoporous TiO<sub>2</sub> coated on glass fibers, using secondary wastewater effluent.

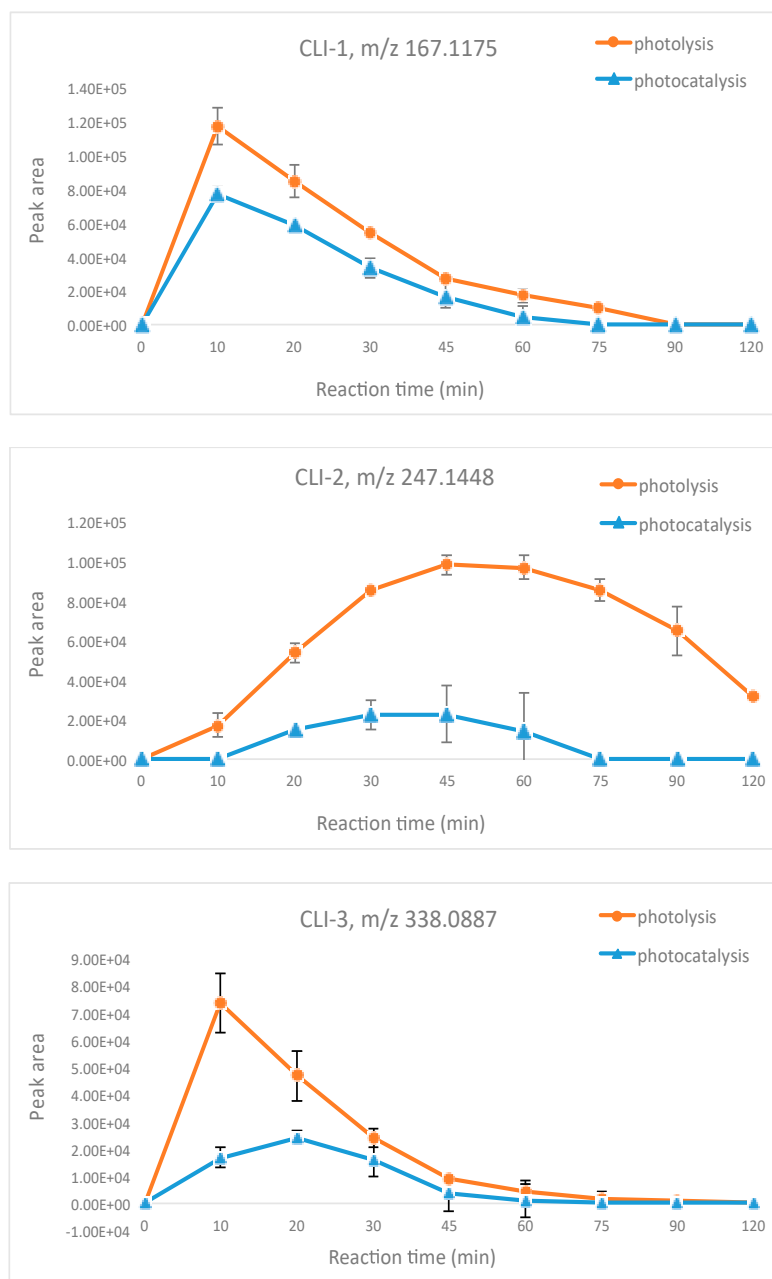

**Figure S3.** Time profiles of CLI TPs during photolysis and photocatalysis with mesoporous TiO<sub>2</sub> coated on glass fibers, using secondary wastewater effluent.

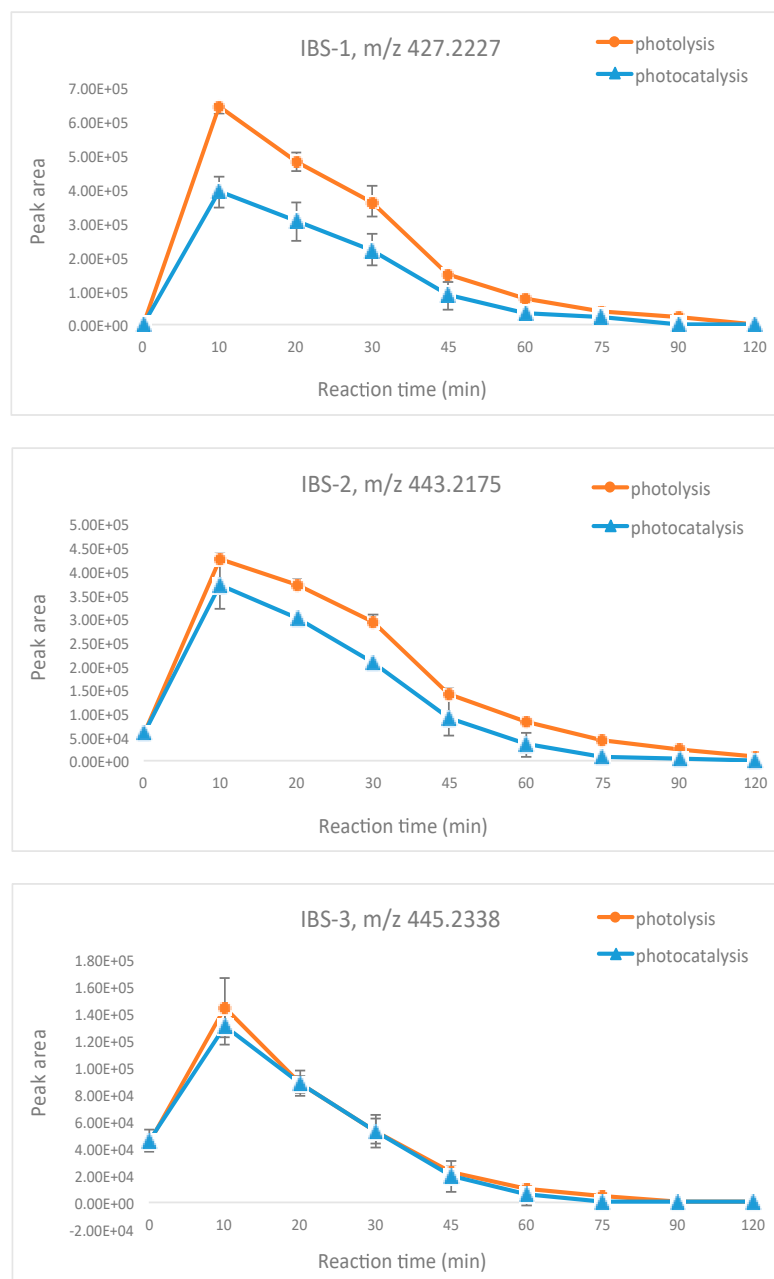

**Figure S4.** Time profiles of IBS TPs during photolysis and photocatalysis with meso-porous TiO<sub>2</sub> coated on glass fibers, using secondary wastewater effluent.

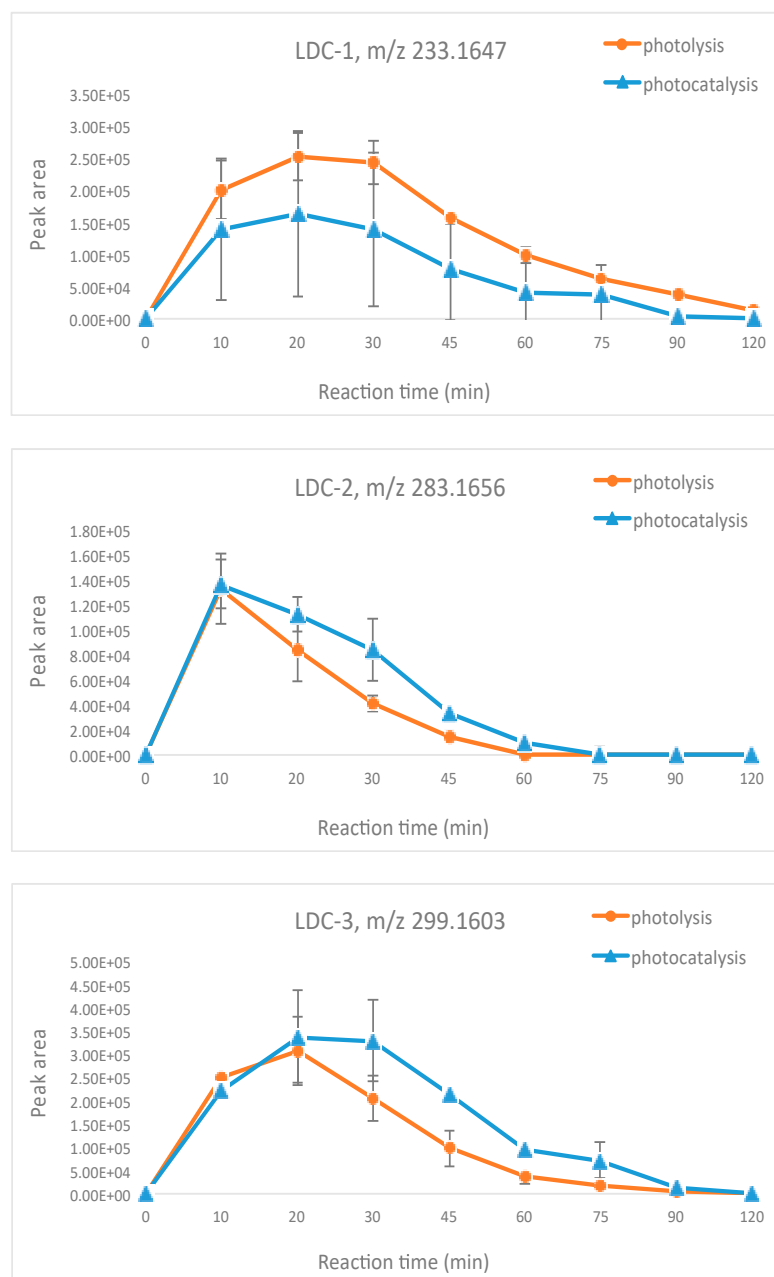

**Figure S5.** Time profiles of LDC TPs during photolysis and photocatalysis with mesoporous TiO<sub>2</sub> coated on glass fibers, using secondary wastewater effluent.

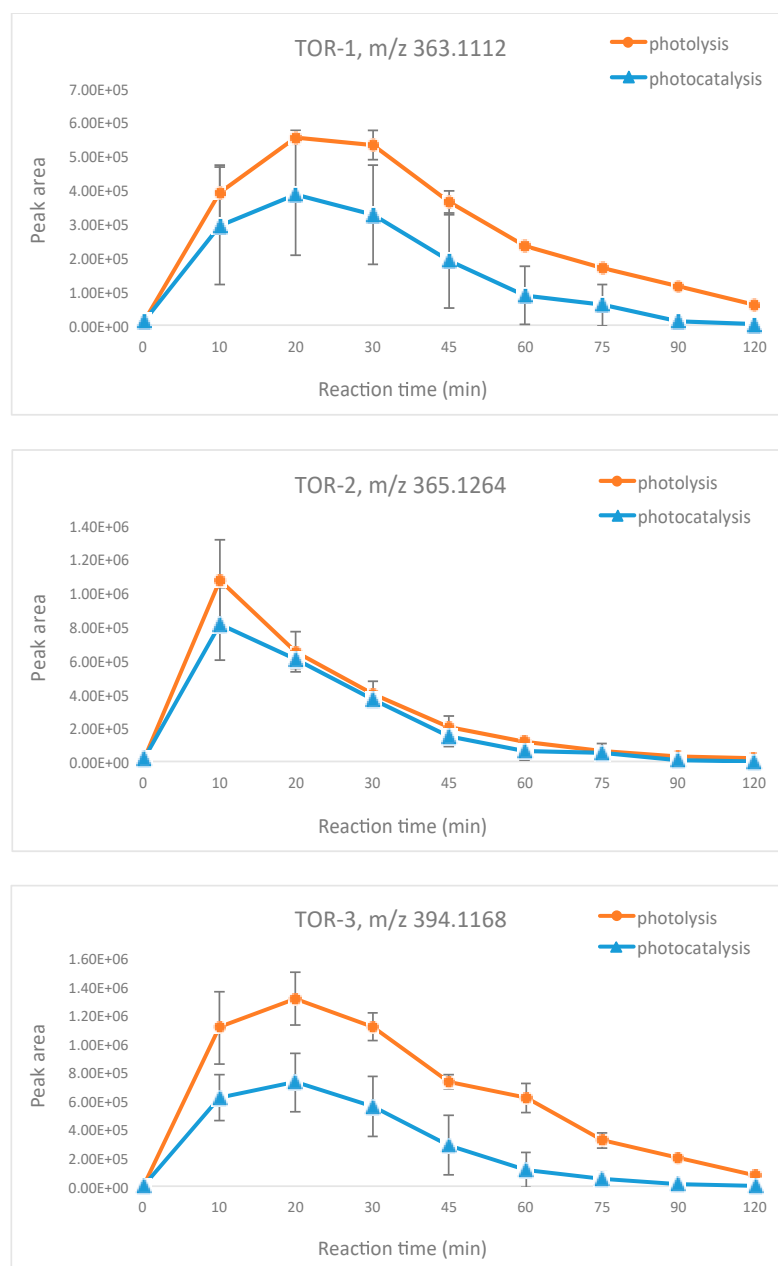

**Figure S6.** Time profiles of TOR TPs during photolysis and photocatalysis with mesoporous TiO<sub>2</sub> coated on glass fibers, using secondary wastewater effluent.

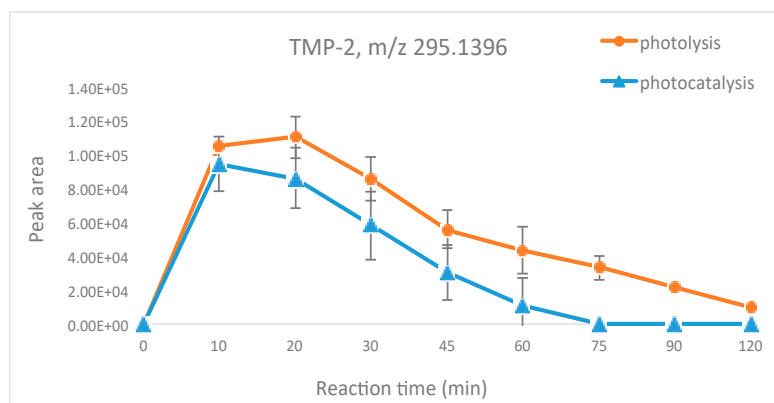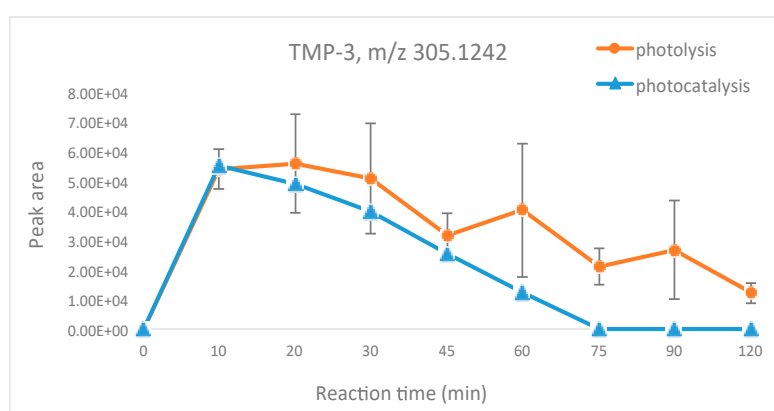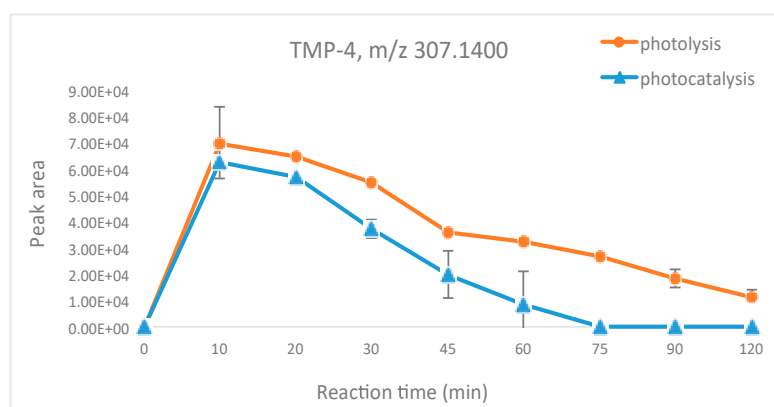

**Figure S7.** Time profiles of TMP TPs during photolysis and photocatalysis with mesoporous TiO<sub>2</sub> coated on glass fibers, using secondary wastewater effluent.



**Table S1.** List of transformation products of the *spiked compounds* detected by suspect screening in photolytic and photocatalytic experiments (mesoporous TiO<sub>2</sub> supported on glass fibers), treating secondary wastewater effluent.

| Metabolite                         | Measured $m/z$ ,<br>[M+H] <sup>+</sup> | RT<br>(min)                   | Empirical<br>Formula | Modification (mass<br>shift)                                     | References                                              | Proposed structure |  |
|------------------------------------|----------------------------------------|-------------------------------|----------------------|------------------------------------------------------------------|---------------------------------------------------------|--------------------|--|
| Carbamazepine<br>(m/z<br>237.1014) | TP1<br>(CBZ-1)<br>Acridine             | 180.080<br>8                  | 5.11                 | C <sub>13</sub> H <sub>9</sub> N                                 | Loss of<br>CHNO+Demethylation<br>(-57.02)               | [41]               |  |
| Carbamazepine                      | TP2<br>(CBZ-2)                         | 223.086<br>8                  | 8.14                 | C <sub>14</sub> H <sub>10</sub> N <sub>2</sub><br>O              | Demethylation (-<br>14.01)                              | [39,40]            |  |
| Carbamazepine                      | TP3<br>(CBZ-3)                         | 241.060<br>1                  | 6.91                 | C <sub>13</sub> H <sub>8</sub> N <sub>2</sub><br>O <sub>3</sub>  | Deethylation and<br>Carboxylic Acid<br>Formation (3.95) | New TP             |  |
| Carbamazepine                      | TP4<br>(CBZ-4)                         | 251.081<br>4                  | 7.16                 | C <sub>15</sub> H <sub>10</sub> N <sub>2</sub><br>O <sub>2</sub> | Ketone Formation<br>(13.98)                             | [39,40]            |  |
| Carbamazepine                      | TP5<br>(CBZ-5)                         | 267.076<br>5                  | 7.89                 | C <sub>15</sub> H <sub>10</sub> N <sub>2</sub><br>O <sub>3</sub> | Demethylation to<br>Carboxylic Acid<br>(29.97)          | [39–41]            |  |
| Carbamazepine                      | TP6<br>(CBZ-6)                         | 269.091<br>7<br>(H<br>isomer) | 7.40                 | C <sub>15</sub> H <sub>12</sub> N <sub>2</sub><br>O <sub>3</sub> | Di-Oxidation (31.99)                                    | [39–41]            |  |

| Metabolite                          | Measured $m/z$ ,<br>[M+H] <sup>+</sup> | RT<br>(min) | Empirical<br>Formula                                             | Modification (mass<br>shift)                                                     | References | Proposed structure                                                                   |
|-------------------------------------|----------------------------------------|-------------|------------------------------------------------------------------|----------------------------------------------------------------------------------|------------|--------------------------------------------------------------------------------------|
| Clarithromycin<br>(m/z<br>748.4762) | TP7<br>(CLR-1)<br>622.3769             | 5.70        | C <sub>30</sub> H <sub>55</sub> N<br>O <sub>12</sub>             | Loss of C <sub>8</sub> H <sub>14</sub> O <sub>3</sub> +Di-Oxidation<br>(-126.09) | [39]       | 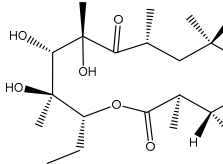   |
| Clarithromycin                      | TP8<br>(CLR-2)<br>746.4647             | 7.78        | C <sub>38</sub> H <sub>67</sub> N<br>O <sub>13</sub>             | Desaturation (-2.01)                                                             | [39]       |    |
| Clarithromycin                      | TP9<br>(CLR-3)<br>762.4589             | 7.53        | C <sub>38</sub> H <sub>67</sub> N<br>O <sub>14</sub>             | Ketone Formation<br>(13.98)                                                      | [39,42]    |  |
| Clarithromycin                      | TP10<br>(CLR-4)<br>780.4701            | 6.71        | C <sub>38</sub> H <sub>69</sub> N<br>O <sub>15</sub>             | Di-Oxidation (31.99)                                                             | [39]       |  |
| Climbazole<br>(m/z<br>293.1050)     | TP11<br>(CLI-1)<br>167.1175            | 4.51        | C <sub>9</sub> H <sub>14</sub> N <sub>2</sub><br>O               | Loss of C <sub>6</sub> H <sub>3</sub> OCl (-<br>125.98)                          | [43]       |  |
| Climbazole                          | TP12<br>(CLI-2)<br>247.1448            | 8.11        | C <sub>14</sub> H <sub>18</sub> N <sub>2</sub><br>O <sub>2</sub> | Loss of Cl->H+Demethylation and Hydrogenation<br>(-45.96)                        | New TP     |  |

| Metabolite                      | Measured $m/z$ ,<br>[M+H] <sup>+</sup> | RT<br>(min)  | Empirical<br>Formula | Modification (mass<br>shift)                                        | References                  | Proposed structure |
|---------------------------------|----------------------------------------|--------------|----------------------|---------------------------------------------------------------------|-----------------------------|--------------------|
| Climbazole                      | TP13<br>(CLI-3)                        | 338.088<br>7 | 6.71                 | C <sub>15</sub> H <sub>16</sub> N <sub>3</sub><br>O <sub>4</sub> Cl | Nitro climbazole<br>(44.98) | New TP             |
| Irbesartan<br>(m/z<br>429.2362) | TP14<br>(IBS-1)                        | 427.222<br>7 | 10.37                | C <sub>25</sub> H <sub>26</sub> N <sub>6</sub><br>O                 | Desaturation (-2.01)        | [47]               |
| Irbesartan                      | TP15<br>(IBS-2)                        | 443.217<br>5 | 8.07                 | C <sub>25</sub> H <sub>26</sub> N <sub>6</sub><br>O <sub>2</sub>    | Ketone Formation<br>(13.98) | [46]               |
| Irbesartan                      | TP16<br>(IBS-3)                        | 445.233<br>8 | 7.23                 | C <sub>25</sub> H <sub>28</sub> N <sub>6</sub><br>O <sub>2</sub>    | Oxidation (15.99)           | New TP             |
| Lidocaine<br>(m/z<br>235.1794)  | TP17<br>(LDC-1)                        | 233.164<br>7 | 5.88                 | C <sub>14</sub> H <sub>20</sub> N <sub>2</sub><br>O                 | Desaturation (-2.01)        | New TP             |
| Lidocaine                       | TP18<br>(LDC-2)                        | 283.165<br>6 | 3.25                 | C <sub>14</sub> H <sub>22</sub> N <sub>2</sub><br>O <sub>4</sub>    | Tri-Oxidation (47.98)       | New TP             |
| Lidocaine                       | TP19<br>(LDC-3)                        | 299.160<br>3 | 3.02                 | C <sub>14</sub> H <sub>22</sub> N <sub>2</sub><br>O <sub>5</sub>    | Tetra-Oxidation<br>(63.98)  | New TP             |

| Metabolite   |                                    | Measured $m/z$ ,<br>[M+H] <sup>+</sup> | RT<br>(min) | Empirical<br>Formula                                               | Modification (mass<br>shift)                           | References | Proposed structure                                                                   |
|--------------|------------------------------------|----------------------------------------|-------------|--------------------------------------------------------------------|--------------------------------------------------------|------------|--------------------------------------------------------------------------------------|
| Torseimide   | TP20<br>(TOR-1)                    | 363.111<br>2                           | 7.73        | C <sub>16</sub> H <sub>18</sub> N <sub>4</sub><br>O <sub>4</sub> S | Ketone Formation<br>(13.98)                            | [49]       | 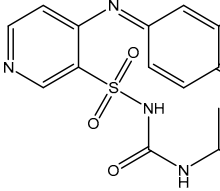   |
| Torseimide   | TP21<br>(TOR-2)                    | 365.126<br>4                           | 5.83        | C <sub>16</sub> H <sub>20</sub> N <sub>4</sub><br>O <sub>4</sub> S | Oxidation (15.99)                                      | [49]       |    |
| Torseimide   | TP22<br>(TOR-3)                    | 394.116<br>8                           | 7.27        | C <sub>16</sub> H <sub>19</sub> N <sub>5</sub><br>O <sub>5</sub> S | Nitro torsemide<br>(44.98)                             | [49]       |   |
| Trimethoprim | TP23<br>(TMP-1)<br>3-desmethyl-TMP | 277.129<br>1                           | 6.27        | C <sub>13</sub> H <sub>16</sub> N <sub>4</sub><br>O <sub>3</sub>   | Demethylation (-<br>14.01)                             | [38]       |  |
| Trimethoprim | TP24<br>(TMP-2)                    | 295.139<br>6                           | 4.64        | C <sub>13</sub> H <sub>18</sub> N <sub>4</sub><br>O <sub>4</sub>   | Loss of CH <sub>2</sub> +Internal<br>Hydrolysis (3.99) | [38]       |  |
| Trimethoprim | TP25<br>(TMP-3)                    | 305.124<br>2                           | 5.08        | C <sub>14</sub> H <sub>16</sub> N <sub>4</sub><br>O <sub>4</sub>   | Ketone formation<br>(13.98)                            | [38]       |  |
| Trimethoprim | TP26<br>(TMP-4)                    | 307.140<br>0                           | 4.68        | C <sub>14</sub> H <sub>18</sub> N <sub>4</sub><br>O <sub>4</sub>   | Oxidation (15.99)                                      | [38]       |  |
